# Supplementary material for: Nobiletin inhibits human osteosarcoma cells metastasis by blocking ERK and JNK-mediated MMPs expression
Source: PubMed Central journal article supplement (PMC5085222; doi:10.18632/oncotarget.9106), 2016-04-29
Supplement: oncotarget-07-35208-s001.pdf [file oncotarget-07-35208-s001.pdf]

## SUPPLEMENTARY FIGURES

(A)

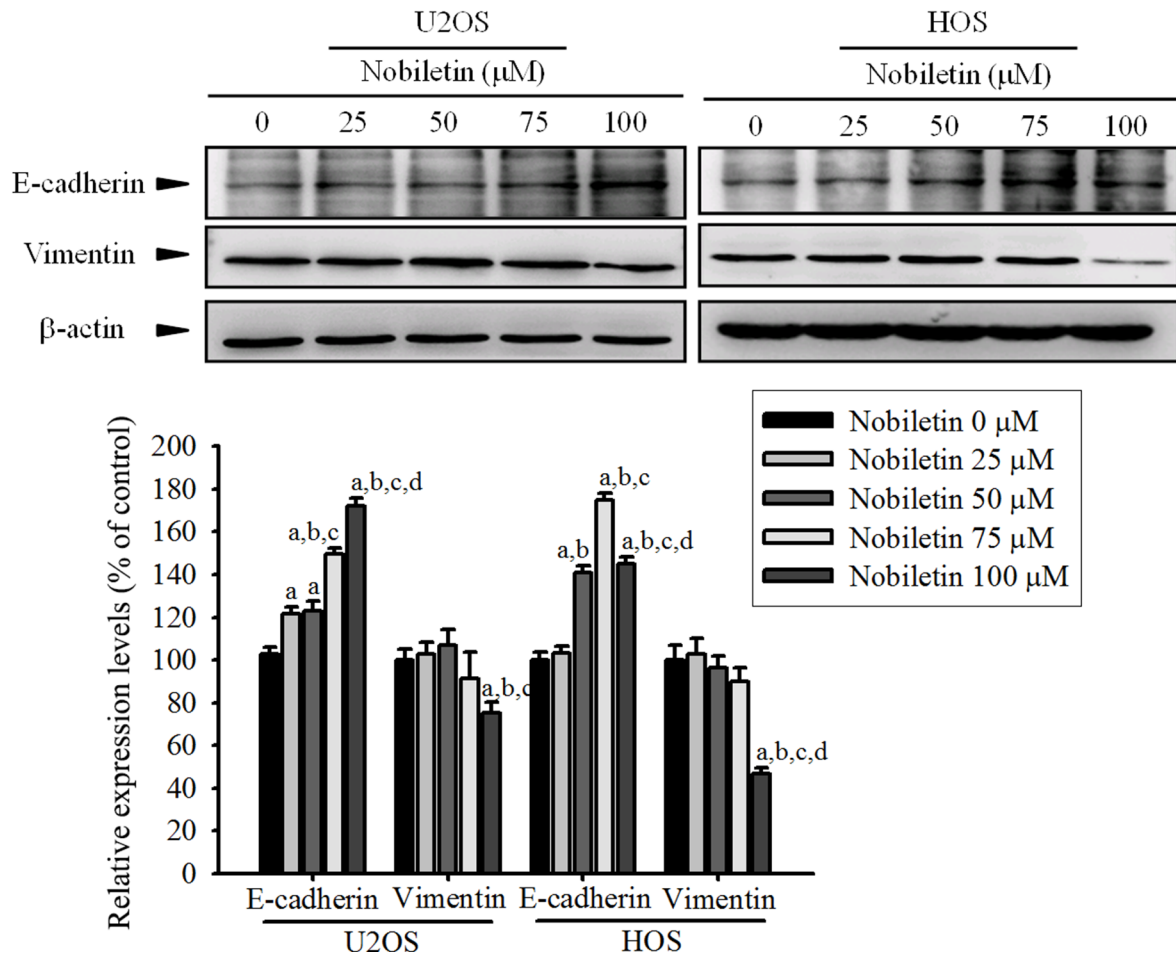**Supplementary Figure S1: Effects of nobiletin on the cell epithelial–mesenchymal transition in U2OS and HOS cells.**

U2OS and HOS cells were treated with nobiletin (0–100 μM) for 24 h and then subjected to western blotting to analyze the expression of E-cadherin and Vimentin. Quantitative results of E-cadherin and Vimentin protein levels, which were adjusted with β-actin protein level. Concentration effects: E-cadherin (U2OS:  $F = 54.279$ ,  $p < 0.001$ ; HOS:  $F = 83.261$ ,  $p < 0.001$ ); Vimentin (U2OS:  $F = 8.049$ ,  $p = 0.004$ ; HOS:  $F = 14.702$ ,  $p < 0.001$ ). <sup>a</sup>Significantly different,  $p < 0.05$ , when compared with 0 μM. <sup>b</sup>Significantly different,  $p < 0.05$ , when compared with 25 μM. <sup>c</sup>Significantly different,  $p < 0.05$ , when compared with 50 μM. <sup>d</sup>Significantly different,  $p < 0.05$ , when compared with 75 μM.

(A)

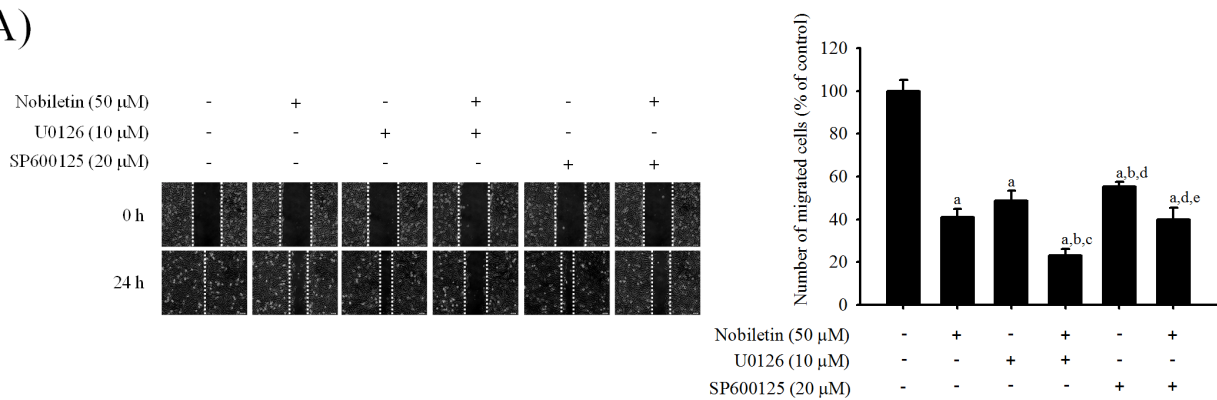

**Supplementary Figure S2: Effect of nobiletin, U0126 and SP600125 on *in vitro* wound closure in U2OS cell.** U2OS cells were co-treated with specific protein inhibitor U0126 or Sp600125, which incubated in the presence or absence of nobiletin (50  $\mu$ M) for 24 h in a serum-containing medium. At 0 h and 24 h, phase-contrast pictures of the wounds at four different locations were taken. Cells migrating into the wound area were counted using the dash line as time zero.  $F=112.573, p < 0.001$ . <sup>a</sup>Significantly different,  $p < 0.05$ , when compared with 0  $\mu$ M. <sup>b</sup>Significantly different,  $p < 0.05$ , when compared with nobiletin-treated group. <sup>c</sup>Significantly different,  $p < 0.05$ , when compared with U0126 treated-group. <sup>d</sup>Significantly different,  $p < 0.05$ , when compared with nobiletin plus U0126-treated group. <sup>e</sup>Significantly different,  $p < 0.05$ , when compared with SP600125 treated-group.
